# Supplementary material
Source: Springer Nature journal article supplement (https://www.springermedizin.de/resource/supplementary/12960_2012_326_MOESM1_ESM.pdf/9569956)
Supplement: MOESM1 [file 9569956]

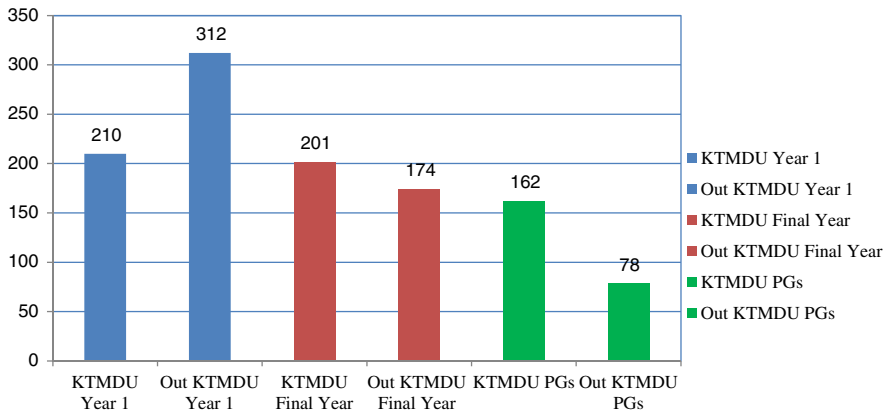

**Actual**/possible numbers of students and doctors with percentage **responding** in brackets

| Location         | Year 1                  | Final Year             | Residents and Interns  |
|------------------|-------------------------|------------------------|------------------------|
| Kathmandu        | 210/260 ( <b>81%</b> )  | 201/260 ( <b>77%</b> ) | 162/320 ( <b>51%</b> ) |
| Out of Kathmandu | 312/ 450 ( <b>69%</b> ) | 174/250 ( <b>70%</b> ) | 78/280 ( <b>28%</b> )  |
